# Supplementary material for: Nanosized lanthanide oxide rods in I1O3 hybrid organic–inorganic frameworks involving in situ ligand synthesis
Source: Royal Society of Chemistry journal article supplement (doi:10.1039/b804490b), 2008-01-01
Supplement: b804490b.pdf [file b804490b.pdf]

## Supplementary Materials

### Nanosized lanthanide oxide rods in $I^1O^3$ hybrid organic-inorganic frameworks involving *in situ* ligand synthesis

Lan-Fen Chen, Jian Zhang, Guo-Qiang Ren, Zhao-Ji Li, Ye-Yan Qin, Pei-Xiu Yin,  
Jian-Kai Cheng and Yuan-Gen Yao\*

*State Key Laboratory of Structural Chemistry, Fujian Institute of Research on the  
Structure of Matter, Chinese Academy of Sciences, Fuzhou, Fujian 350002, P.R.  
China*

\*Corresponding author. E-mail: [yyg@fjirsm.ac.cn](mailto:yyg@fjirsm.ac.cn). Fax: 86-59183714946.

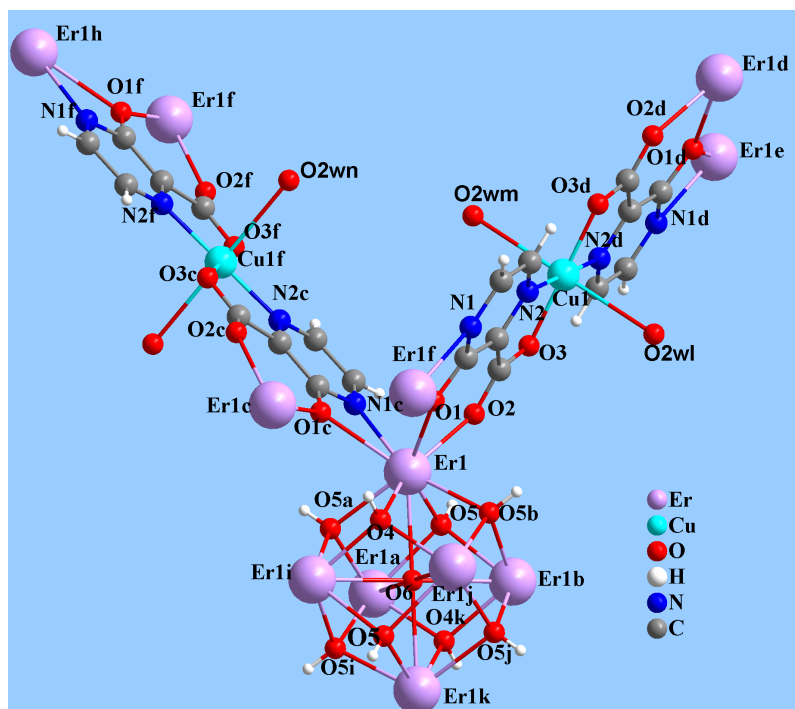

**Figure S1.** The coordination environments of Er1 and Cu1 atoms in **3**, Er<sub>6</sub> cluster constructed by Er1 atom and each Er1 atom bridged by two L<sup>Cu</sup> SBUs. Atom label with “a” or “b”, etc. refer to symmetry-generated atoms. Symmetry codes: (a) 1/3+y, 2/3-x+y, 2/3-z; (b) 1/3+x-y, -1/3+x, 2/3-z; (c) 1/3+y, 2/3-x+y, -1/3-z; (d) 2-x, 1-y, -z; (e) 5/3-x +y, 4/3-x, 1/3+z; (f) 1/3+x-y, -1/3+x, -1/3-z; (g) 4/3-y, -1/3+x-y, -1/3+z; (h) 5/3-x, 1/3-y, -2/3-z; (i) 1-x+y, 1-x, z; (j) 1-y, x-y, z; (k) 4/3-x, 2/3-y, 2/3-z; (l) x, y, 1+z; (m) 2-x, 1-y, 1-z; (n) 1/3+y, 2/3-x+y, -4/3-z; (o) 4/3-y, -1/3+x-y, 2/3+z.

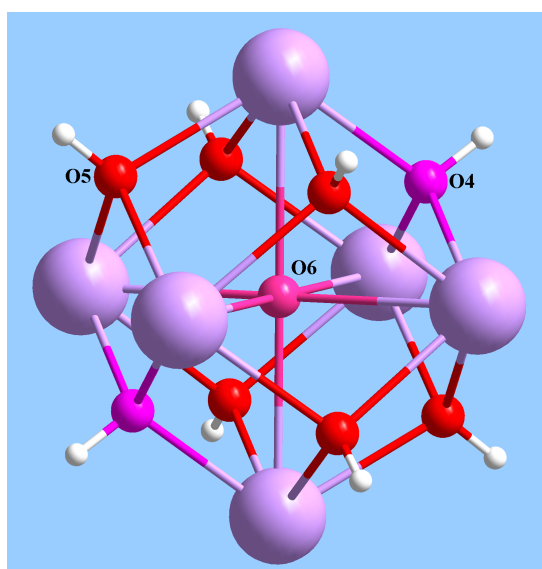

**Figure S2.** [Er<sub>6</sub>(μ<sub>6</sub>-O)(μ<sub>3</sub>-OH)<sub>8</sub>]<sup>8+</sup> cluster unit containing three different μ-O bridges, μ<sub>3</sub>-O(O4): magenta; μ<sub>3</sub>-O(O5): red; μ<sub>6</sub>-O(O6): pink.

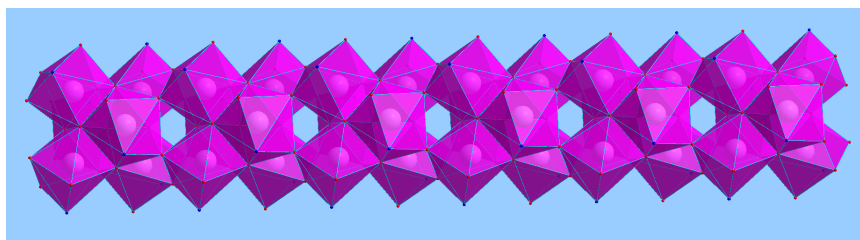

**Figure S3.** View of infinite 1D nano-sized Er-O-Er rods.

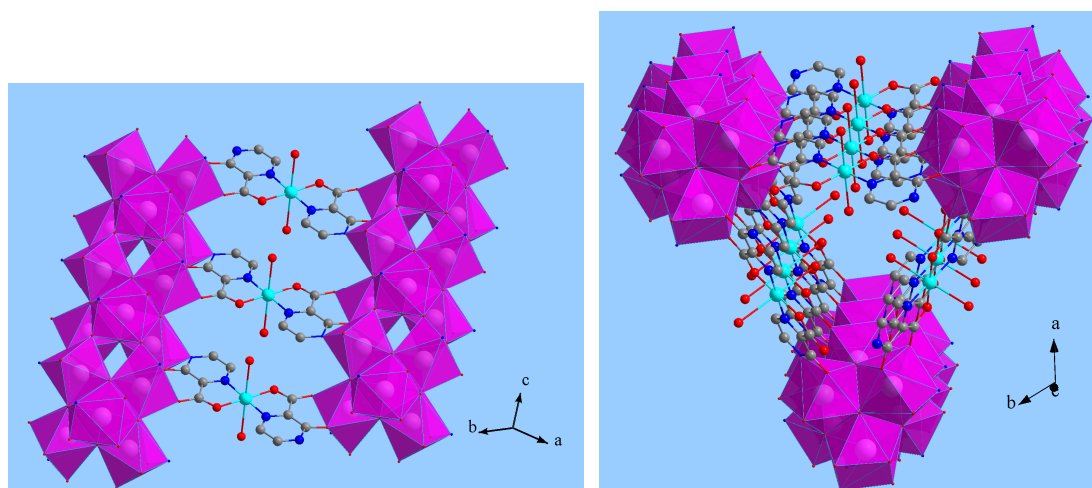

**Figure S4.** (left) View of two infinite 1D inorganic Er-O-Er rods linked by  $L^{Cu}$  SBUs; (right) Trigonal channel formed by  $L^{Cu}$  SBUs connecting with three offset 1D Er-O-Er rods.

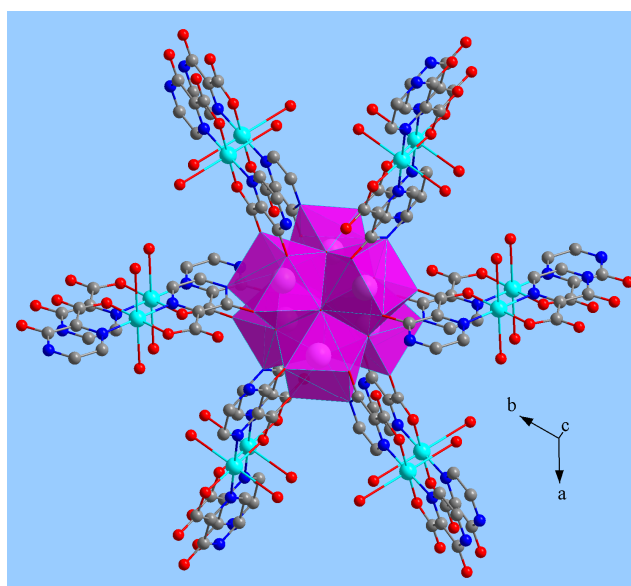

**Figure S5.** Each  $[Er_6(\mu_6-O)(\mu_3-OH)_8]^{8+}$  cluster unit bridged by twelve  $L^{Cu}$  SBUs.

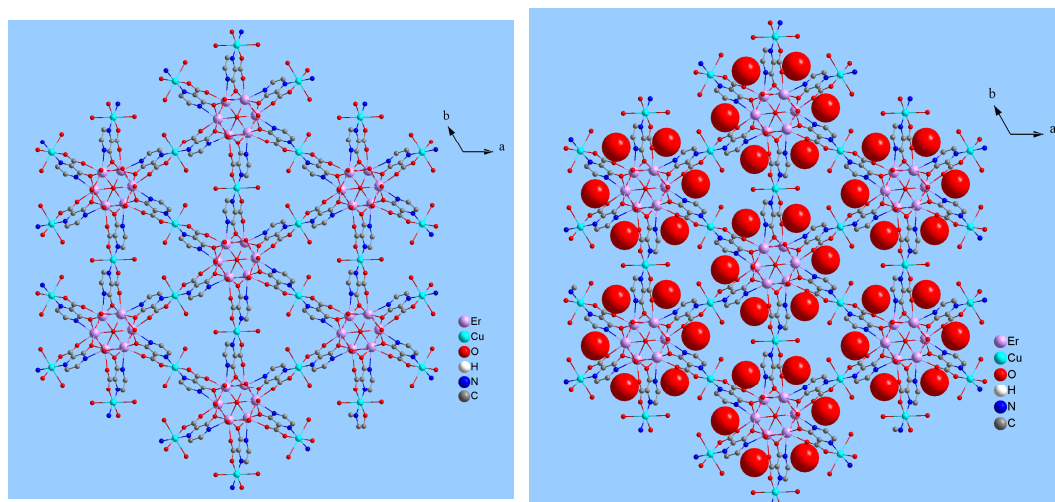

**Figure S6.** (left) View of each 1D nano-sized Er-O-Er rod linked by six equivalent ones to form the 3D network of **3** with trigonal channels along the *c*-axis direction; (right) View of the trigonal channels filling with the lattice water molecules.

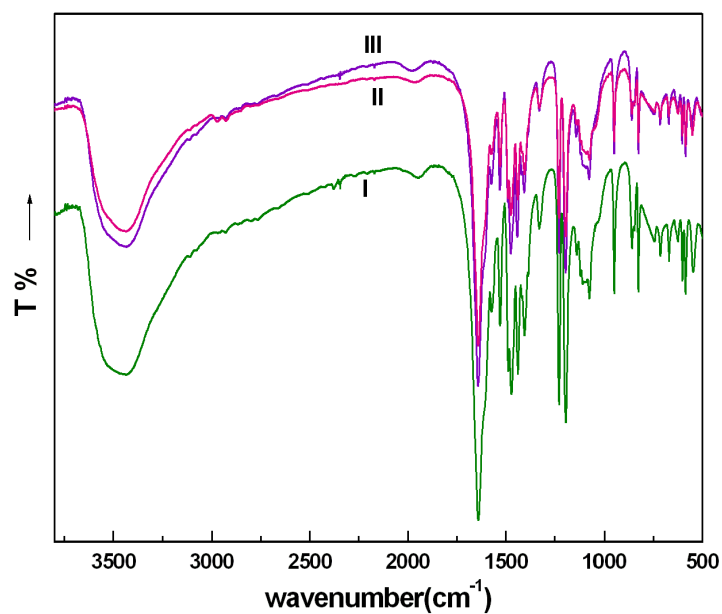

**Figure S7.** The IR spectra of 1-3. I (Dy); II (Ho); III (Er)

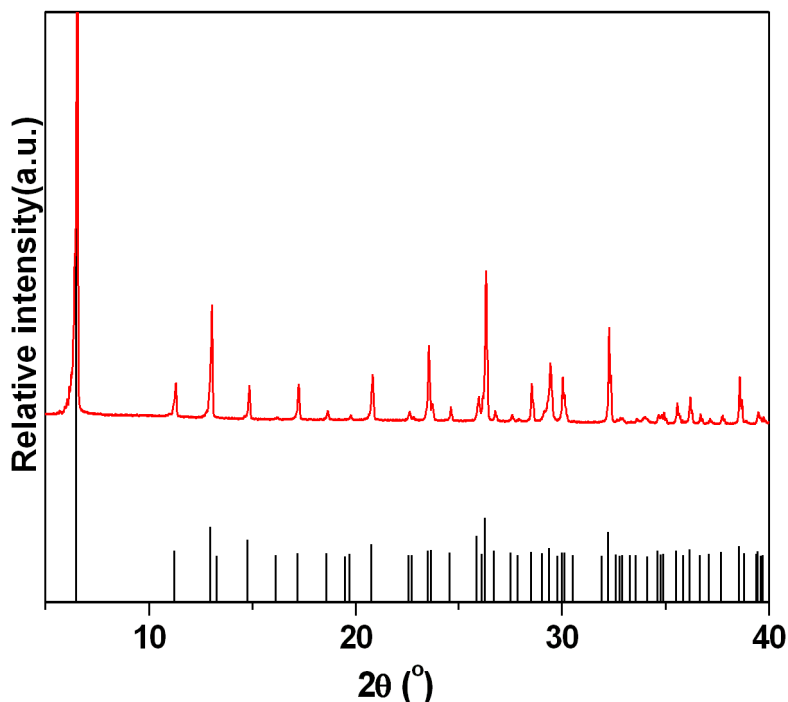

**Figure S8** XPRD patterns for **3**: (top) measured at room temperature; (bottom) calculated on the basis of the structure determined by single-crystal X-ray diffraction.

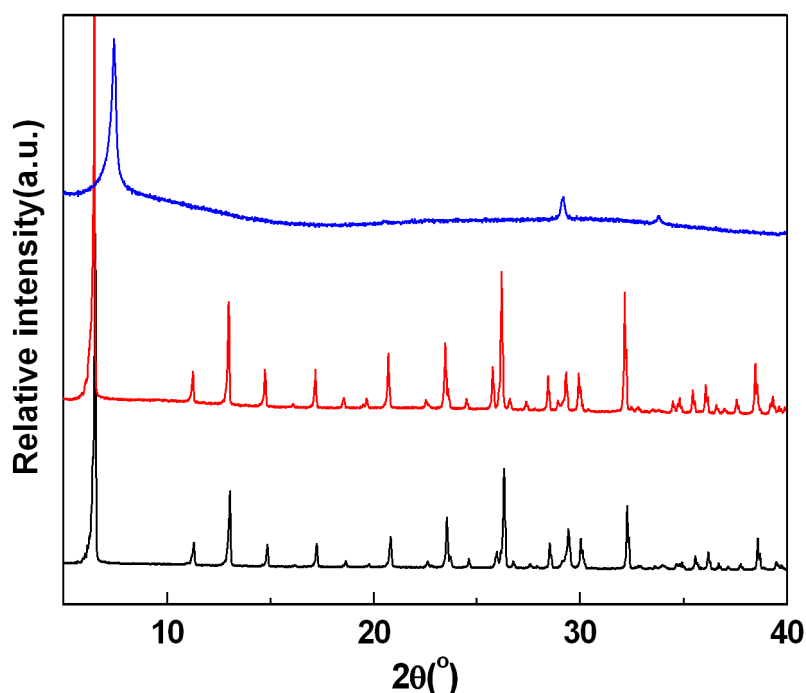

**Figure S9** XPRD patterns of **3**: (black) measured at room temperature; (red) heated to 250 °C for 20min; (blue) heated to 360 °C for 20min under a nitrogen atmosphere. The diffraction peaks on 250 °C corresponded well to the pattern at room temperature in position, indicating the framework of **3** is stable before 250 °C when the partly coordination water molecules were removed from the structure. However, the diffraction peaks on 360 °C reveal the collapse of the whole framework.

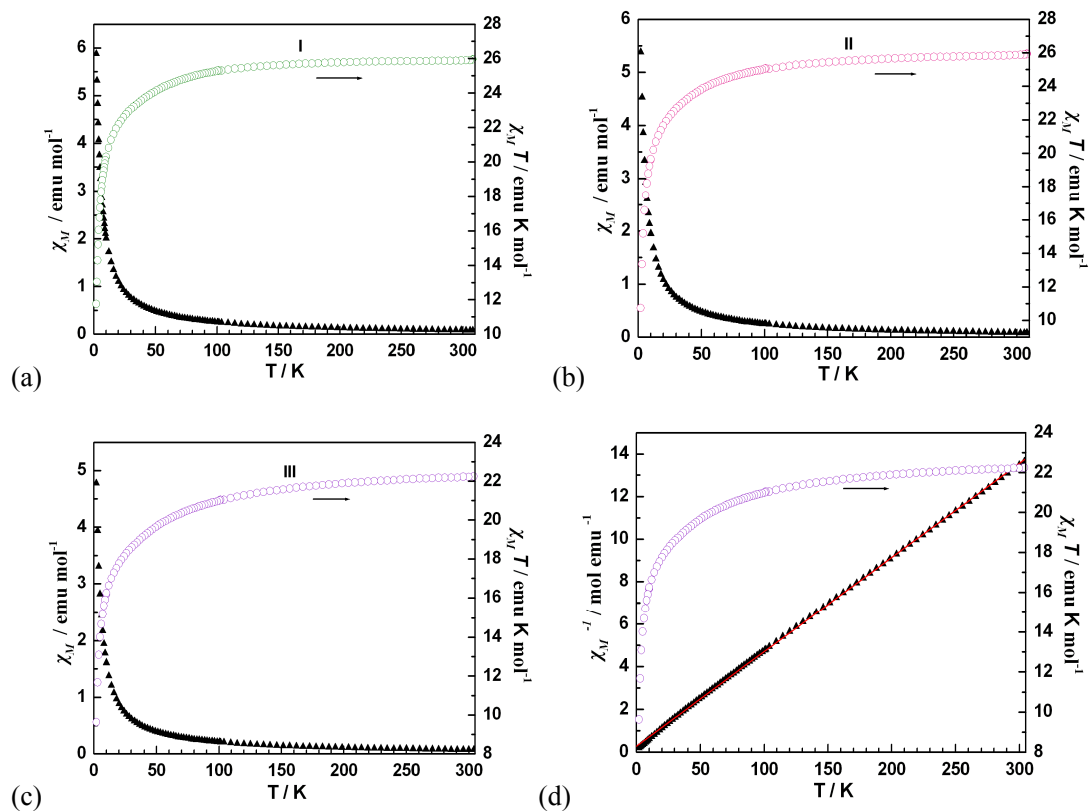

**Figure S10.** (a)(b)(c) Temperature dependence of  $\chi_M$  and  $\chi_M T$  for **1-3**, **I (Dy)**; **II (Ho)**; **III (Er)**; (d) Temperature dependence of  $\chi_M T$  and  $\chi_M^{-1}$  for **3**, the solid red line represents the best fit obtained from a Curie-Weiss law.

**Table S1.** Selected Bond Angles (°) for Compound **3**<sup>a</sup>.

|                                         |            |                                          |            |
|-----------------------------------------|------------|------------------------------------------|------------|
| O4—Er1—O5                               | 115.2(3)   | O4—Er1—O1 <sup>iii</sup>                 | 82.3(2)    |
| O4—Er1—O5 <sup>i</sup>                  | 74.96(14)  | O5—Er1—O1 <sup>iii</sup>                 | 139.16(11) |
| O5—Er1—O5 <sup>i</sup>                  | 75.43(11)  | O5 <sup>i</sup> —Er1—O1 <sup>iii</sup>   | 145.03(12) |
| O4—Er1—O1                               | 85.9(2)    | O1—Er1—O1 <sup>iii</sup>                 | 70.95(5)   |
| O5—Er1—O1                               | 142.35(12) | O2—Er1—O1 <sup>iii</sup>                 | 109.30(13) |
| O5 <sup>i</sup> —Er1—O1                 | 81.14(13)  | O5 <sup>ii</sup> —Er1—O1 <sup>iii</sup>  | 76.26(12)  |
| O4—Er1—O2                               | 150.63(12) | N1 <sup>iii</sup> —Er1—O1 <sup>iii</sup> | 52.04(13)  |
| O5—Er1—O2                               | 74.19(13)  | O4—Er1—O6                                | 54.2(2)    |
| O5 <sup>i</sup> —Er1—O2                 | 81.31(14)  | O5—Er1—O6                                | 60.94(9)   |
| O1—Er1—O2                               | 73.45(13)  | O5 <sup>i</sup> —Er1—O6                  | 60.71(9)   |
| O4—Er1—O5 <sup>ii</sup>                 | 73.75(14)  | O1—Er1—O6                                | 129.19(9)  |
| O5—Er1—O5 <sup>ii</sup>                 | 74.28(11)  | O2—Er1—O6                                | 126.16(10) |
| O5 <sup>i</sup> —Er1—O5 <sup>ii</sup>   | 120.64(17) | O5 <sup>ii</sup> —Er1—O6                 | 60.01(9)   |
| O1—Er1—O5 <sup>ii</sup>                 | 143.34(12) | N1 <sup>iii</sup> —Er1—O6                | 135.67(12) |
| O2—Er1—O5 <sup>ii</sup>                 | 134.50(13) | O1 <sup>iii</sup> —Er1—O6                | 123.87(8)  |
| O4—Er1—N1 <sup>iii</sup>                | 131.12(17) | O3 <sup>iv</sup> —Cu1—O3                 | 180.0(5)   |
| O5—Er1—N1 <sup>iii</sup>                | 94.52(14)  | O3 <sup>iv</sup> —Cu1—N2                 | 96.1(2)    |
| O5 <sup>i</sup> —Er1—N1 <sup>iii</sup>  | 153.18(14) | O3—Cu1—N2                                | 83.9(2)    |
| O1—Er1—N1 <sup>iii</sup>                | 93.33(15)  | O3 <sup>iv</sup> —Cu1—N2 <sup>iv</sup>   | 83.9(2)    |
| O2—Er1—N1 <sup>iii</sup>                | 71.98(16)  | O3—Cu1—N2 <sup>iv</sup>                  | 96.1(2)    |
| O5 <sup>ii</sup> —Er1—N1 <sup>iii</sup> | 78.73(15)  | N2—Cu1—N2 <sup>iv</sup>                  | 180.0(4)   |
| O3—Cu1—O2w <sup>v</sup>                 | 92.88(5)   | N2—Cu1—O2w <sup>v</sup>                  | 87.21(6)   |
| O3 <sup>iv</sup> —Cu1—O2w <sup>v</sup>  | 87.12(5)   | N2 <sup>iv</sup> —Cu1—O2w <sup>v</sup>   | 92.80(6)   |
| O2w <sup>v</sup> —Cu1—O2w <sup>vi</sup> | 180.00(2)  |                                          |            |

<sup>a</sup> Symmetry codes for **3**: (i) 1/3+x-y, -1/3+x, 2/3-z; (ii) 1/3+y, 2/3-x+y, 2/3-z; (iii) 1/3+y, 2/3-x+y, -1/3-z; (iv) 2-x, 1-y, -z; (v) 2-x, 1-y, 1-z; (vi) x, y, 1+z.
